# Supplementary material for: Human Developmental Enhancers Conserved between Deuterostomes and Protostomes
Source: PubMed Central journal article supplement (PMC3410860; doi:10.1371/journal.pgen.1002852), 2012-08-02
Supplement: pgen.1002852.s001.pdf [file pgen.1002852.s001.pdf]

## Dataset S1.

Sequences tested in zebrafish transgenic enhancer assays

>Bicore1\_human

CTAGCTAGACCAGTTTGTCTGTCCTCCATGGCGACCGCCCGCGGGCGCCAG  
CCTGACAGTCCGTCCGGGTTTTATGAATGGGTGACGTACAGGCCTGGCG  
TCTAACGGTCTGAGCCGCTGGTTCAGACGCTGACACA

>Bicore1\_zebrafish

TGCCAGCCTGTTGTTTGTGTTGTTGCTATAGGGACCGCCCGCTCGGGCGCCAG  
GCTGACAGGCGTCAAGGCTCGAATGAATGGGTGACGTACAGGCGCTGGCG  
CCCGGCAGTCTGCTTCGGTTTTGTTGGACAAAT

>Bicore1\_urchin

GTTACTATGGCGACCGCCAGACCGGCGCCCGTCTGCTATCGGATTGTGGG  
TGGATGAATGGGTGACGTACAGATCGTGGCGCCGGTCTGTCCCGTGAG

>Bicore1\_limpet

TATCAGTGAGTCGAGGGCGGCTTCTTTGAAGTTATGTTTGATTGACAGGT  
ATGTAACGCTAGCGACCGACTATACGGCGCCGGCTCGAGAGGAAATACAT  
ACAGTGTGTAATGGGTGACGTACACAAGTGGCGGCCAGTCAGTCTGCTAG  
CTGAATTGTTGATTGTAGAGGTTTACATCGAGTTATCACGTGCAGAAAAAC

>Bicore2\_human

CTCCCACCCTGTTTTCTCCCTCCCCCCTTCTTTGGGCATCTCCACCCC  
TCCATCAATTGTCAATGTTTCTCGACCGCAATCAATCAGTTATTTGTCAG  
CTCTTGTCAATCCTCCCGTGATTTATGTGAGCTTTTGTGCTGATTACAA  
GGCGGGTGCGACTTGAAGGGAAAAAGAGAGAGGGGAGAGAGAGACGGAGAG  
GAAGGAGGAGATTGAGAGGGAACCTGGAGGAGGGGAAAAAGAGGAGCGGCCT

>Bicore2\_zebrafish

AAGTGACTCTTCTTCTGGATGCTTCTTTTGGCCTTTTCTCTGTCACTCGC  
GGCACATAATCAGCTTCAAAAGCTGACGTGAAGTAAGAAAAGGATTGACA  
GCGACTGACAAATAACTGATTGATTGCGGTGAGCAGAATTGACAGTTGA  
CGGAGGGGTGGGGATAGAAATAGAAGGGCGGTGTATATTATATTGAAAAAC  
ATGTGACATTACATCCCTCTACTGCATTGGTCTGCTCTTGT

>Bicore2\_urchin

CGATTTATCTCGGGGAATCATACCCCTTTTCAAAAGCCGTTTTTCAAATT  
ACTCGAGCCATGTTATCAACAACAAAACGCTGACATAAATCAGACGGAAT  
TGACAAGGCTGACACCGCATTGATTGATCGCAGAACAGCGAGCGGCACT  
GGACGCCTGCCAACGGGAATTGCTAATCGCGAATTTGATTGGCTGGCGCG  
GAGCATGTGACAGGATCACATATCAATCATCCCCG

>Bicore2\_tick

CCGACGGCCGTCCACCCAAGCGGCCCAAAGGAAGACCGCCCGGCTCTGA  
CAACAAAAGCTGACATAAATCATGCCTGATTGGCAGCTCTGACAACGGGC  
TGATGGATAGCGTTGTAAGGTTGACAGCTGGCCCCACGCCAGATCATT  
GCTCGGCCGGGCTTCCATTGGCCGCGCGACCGCGGAGCGCTTCGGGGGG

Sequence tested in sea urchin transgenic enhancer assay

>Bicore1\_urchin\_long

CGTGGAGGCGTCAAATAGTCTCTGCAATCTACAAGCGCAGACCTAACACA  
AAAATCCGATATAAAAAGACGATTGCCATCTTATGGTCTTCATTTGTATTT  
TGACGGATTTTTTAGTAGAATATGAGCAGATAGTACTGATATGGTTTTGT  
AGACAAATAGGATATCATAATCCTGAAAATCTGTATTTTAAACTTCCTCA  
AAAGTTTTGGACTTTCTTAAAGGTCTGTAAAGTAGACTTGGCAATGTCTC  
AGGCGGGAGTGCAGGTGTGCAAGCGACGGGTGTGAATAGTGGGCGCCCC  
AAAGACCCGACCACCAGTTTAGCAAAGTGACGATCCCAAAGCCATTTAT  
CGCTGCTCTCGATAGTTTGTAGTAATTGATTTCAGGCTGCGGGACGCCTT  
TGATGTTGGTGATTGGCGTGTGCGTTACTATGGCGACCGCCAGACCGGCG  
CCCGTCTGCTATCGGATTGTGGGTGGATGAATGGGTGACGTCACAGATCG  
TGGCGCCGGTCTGTGCGCGTGAGCTCTGGTAGTATTGGAGGGGGCTTAG  
GAGGGCCAATTAATCACCTGTCACTGGGAACCAGCGGAGTTCCACCACAC  
CCCTAGCCTCAAAATACGAACCCCTGTACAACAGGTGGATGCCACAGACA  
ACTAACATTATCCATCCGAACATTCTGATACTCCAGATGATTAATGCAAC  
CATTCCAGAAATGAAGTCGCTCTATTTTAGGGTACTTTAAAAAGTTACGA  
AACAATAAATGAATAAGAATAACCGAATGTATGGATACATTTTCGGTT  
TGAGACTACGAAGTCTCGGGGGAGGTGTATGAGCTTATGAGGGGTATGTT  
TACAGGTTTACCTATGGTAAAGAATAGGGTGAGTGTGTTGGATTACCATCA  
TGTTCTGCTGCACAGCTGTGAACTGGTTCATGTGACCGCCATATACCAAG  
G

Sequence tested in mouse transgenic enhancer assay

>Bicore2\_human

CCAGAAGGAGCACCCGGTGGGAGTGTGGACACCGGCCGGACTGTCAACTCCAGGGGCGAAGGGAACCTGCACACCCAG  
TGTTTTTTCCTTCGAGTAATCGAGATCCC CGCGCGGCGCAGCGCAGCCACCAGGGTAAGAAGGCAAGGTGGGGAGCC  
GGAGCTGGAAGAAGCCCGCCCGCTCTAATTTCTCAGATTCCGCGGCGGAGAAACCAGAAGCTAGATGGGCAG  
TCGCAGCGGCGGGCTCAACACCGCGAGGAGCGCTGGGCTCTCCGCCCTTCCCGGCCACGTGACGCCCGGGGACGC  
GTAGATTGGGGCAGCAGCGGGGTACATGTTTCTCTGTTTACCCTCAGTCTGTCCCCAACCCCCATTCTTAC  
TCTCCACCCTGTTTTCTCCCTCCCCCTTCTTTGGGCATCTCCACCCTCCATCAATTGTCAATGTTCTCGAC  
CGCAATCAATCAGTTATTTGTCAGCTCTTGTCAATCCTCCCGTGATTTATGTCAGCTTTTGTGCTGATTACAAGGC  
GGGTGCGACTTGAAGGGAAAAAGAGAGAGGGAGAGAGACGGAGAGGAAGGAGGAGATTGAGAGGGAACCTGGAGGA  
GGGAAAAGAGGAGCGGCCTCCTGGGATGGGGTGGGGTGGGGCTCTAAGAAAAAGAATGAAAGAGGCGCACGGTG  
TCAGGAAAATGAATAGCGAGAGTAAAGTGCGCAGGTGCGCCAGGGCGCCGAGAGGGGCGCGCAGGCCTGGAGTGTG  
CGCCTGCCCTCTCGGTGTGCGGAGAGACGCCCTTCCACCTCTGGGAGCCTCGGTCTGTTGGGGTTCGCGGAGTTCCGGG  
GCGGCTCCGGGTACCCGAGACCAGCGGCGGCAACTTCTAACACGGGAGATTTCCCGCCACCCACCCCGCCGCGCG  
AGTCCTCGCGGGGCGTGTGCGTGCGGAGGTGAGGCTGCCACCCTCTGTAGTTCCCTAACCCAAACTCGGAGACT
