# Supplementary material for: Human Developmental Enhancers Conserved between Deuterostomes and Protostomes
Source: PubMed Central journal article supplement (PMC3410860; doi:10.1371/journal.pgen.1002852), 2012-08-02
Supplement: pgen.1002852.s003.pdf [file pgen.1002852.s003.pdf]

10 20 30 40 50 60 70 80 90 100  
 Human Id1 GTTCCATGGCAACGCGCGCGCGGGCGCCAGCC-TGACAGTCCCGTCC--GGGTTTTATGAATGGGTGACGTCAGAGGCC-TGGGGTTAAAGGGTCTGAGCCG  
 Human Id2 GTTGGCATGGCAAGCGCGCGCGCGGGCGCCAGCA-CGACAA--GGCTGCAGGGCCGGC-GTGAATGGGTGGGTGACGTCAGCGCC-TGGGGGAGAGAGTCTGCTCG  
 Human Id4 GTTGTGAGGGCAACGCGCGCGCGGGCGCCAGCG-CAGRGGGGAGGC--GGGTTCCGTGAATGGGTGACGTCAGCGAGC-CGGGGCAGCGAGTCTGGGGG  
 Rhesus GTCTCCATGGCAACGCGCGCGCGGGCGCCAGCC-TGACAGTCCCGTCC--GGGTTTTATGAATGGGTGACGTCAGAGGCC-TGGGGTTAAAGGGTCTGAGCCG  
 Mouse GTCTCCATGGCAACGCGCGCGCGGGCGCCAGCC-TGACAGCCCGTCC--GGGTTTTATGAATGGGTGACGTCAGGGGCC-TGGGGTTAAAGGGTCTGAGCCG  
 Rat GTCTCCATGGCAACGCGCGCGCGGGCGCCAGCC-TGACAGCCCGTCC--GGGTTTTATGAATGGGTGACGTCAGGGGCC-TGGGGTTAAAGGGTCTGAGCCG  
 Guinea Pig GTTTCATAGCGACCGCGCGAGCGGGCGCCAGCC-TGACAGCCCGTCC--GGGTTTTATGAATGGGTGACGTCAGGGGCC-TGGGGTTAAAGGGTCTGAGCCG  
 Cow GTCTCCATGGCAACGCGCGCGCGGGCGCCAGCC-TGACAGCCCGTCC--GGGTTTTATGAATGGGTGACGTCAGGGGCC-TGGGGTTAAAGGGTCTGAGCCG  
 Dog GTCTCCATGGCAACGCGCGCGCGGGCGCCAGCC-TGACAGCCCGTCC--GGGTTTTATGAATGGGTGACGTCAGGGGCC-TGGGGTTAAAGGGTCTGAGCCG  
 Opossum GTCTCCATGACGACCGCGCGCGGGCGCCAGCC-TGACAGCCCGTCC--GGGTTTTATGAATGGGTGACGTCAGGGGCC-TGGGGTTAAAGGGTCTGAGCCG  
 Chicken GTCCGCATGGCAACGCGCGCGCGGGCGCCAGCC-TGACAGCCCG-CG--GAGTTTTATGAATGGGTGACGTCAGGGGCC-TGGGGTTAAAGGGTCTGGGGAG  
 Fugu GTCTCCATGGABACCGCGCGAGCGGGCGCCAGCC-TGACAG-GCGTCAA--GGCTCGGATGAATGGGTGACGTCAGCGCC-CGGGGCTGGCAGTCTGCTGG  
 Tetraodon GTCTCCATGGABACCGCGCGAGCGGGCGCCAGCC-TGACAG-GCGTCAAG--GGCCGGATGAATGGGTGACGTCAGCGCC-TGGGGCTGGCAGTCTGCTGG  
 Osticklebaek GTCTCCATGGABACCGCGCGAGCGGGCGCCAGCC-TGACAG-GCGTCAA--GGCTCGGATGAATGGGTGACGTCAGCGCC-TGGGGCTGGCAGTCTGCTGG  
 Madaka ATTCTCCATGGABACCGCGCGTACGGCGCCAGCC-TGACAG-GCGTCAA--GGCGGGATGAATGGGTGACGTCAGCGCC-CGGGGCTGGCAGTCTGCTGG  
 Zebrafish Id1 GTTGTATAGGACCGCGCGGTGGCGCCAGCC-TGACAG-GCGTCAA--GGCTCGAATGAATGGGTGACGTCAGGGGCC-TGGGGCTGGCAGTCTGCTGG  
 Zebrafish Id2a GTCTCCATAGCAGCGCGGTGGACGGCGCCAGCA-GGACT--GGCTGGAGGGCCCGCTGTCGAATGGGTGACGTCAGGGGCC-TGGGGCTGGCAGTCTGGAGA  
 Zebrafish Id3 -----CGTGAATGGATGACGTCGGGAGCC-CGGGGCTGGCAGTCTGGAGT  
 Amphioxus GTCCGCATAGCGACCGCCAGCCCGACGCCAGTT-TGACAG-GCATCAAGCGGG--GATGAATGGGTGACGTCAGGACAC-TGGGGCTGGCAGTCTGGAGT  
 Oca Urochin GTTACTATGGCAACCGCCAGACCGCGCCCGTC-TGCTATCGGATTG--TGGTGGATGAATGGGTGACGTCAGAGATCGTGGGGCTGGTCTGGCCGTGA  
 Acorn Worm GTGTCCATAGCGACCGCCATCGTGTGGCCAGTC-TGACAG--CATTC A--TAGCCCAATGAATGGGTGACGTCAGAG-AC-TGGGGCTGGCAGTCTGGAGT  
 Limpet GTAAAGCATAGCGACCGCATATACGGGGCCGGCT-CGACAGGAAATACAT--ACAGTGTGAATGGGTGACGTCAGAAATG-CGGGGCTGGTCTGGTCTA--  
 Sea Hare GTGGGT--CGACCGCGTGCCTGGGGCCAGTAAACAAGCAAAAACGTG--CTCCACCTGATGCGTGACGTCAGCATGC-CGGGGCTGGTCTGGCCCG

Figure S2.
