# Supplementary material for: Human Developmental Enhancers Conserved between Deuterostomes and Protostomes
Source: PubMed Central journal article supplement (PMC3410860; doi:10.1371/journal.pgen.1002852), 2012-08-02
Supplement: pgen.1002852.s004.pdf [file pgen.1002852.s004.pdf]

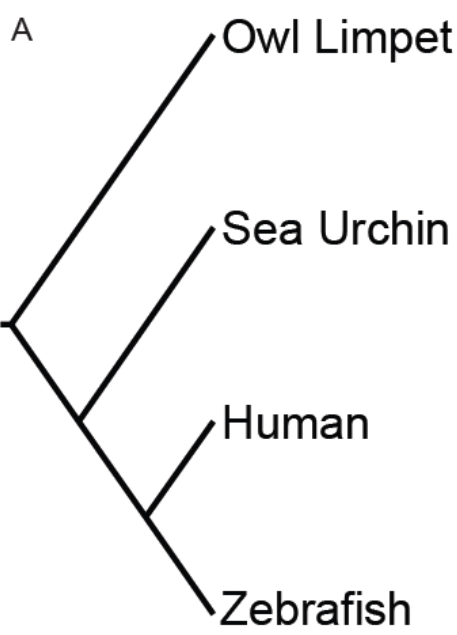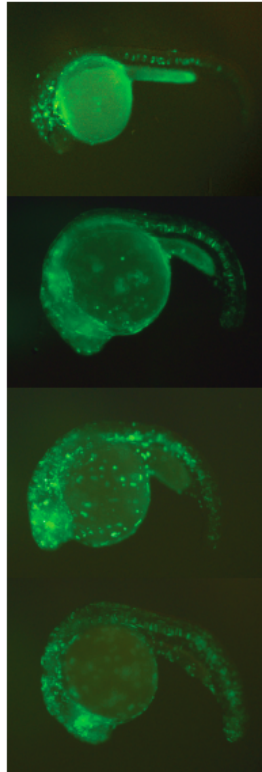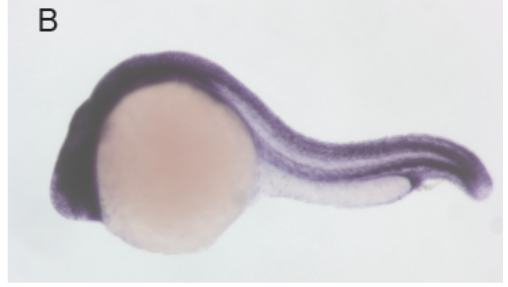

Figure S3.
