# Supplementary material for: Human Developmental Enhancers Conserved between Deuterostomes and Protostomes
Source: PubMed Central journal article supplement (PMC3410860; doi:10.1371/journal.pgen.1002852), 2012-08-02
Supplement: pgen.1002852.s005.pdf [file pgen.1002852.s005.pdf]

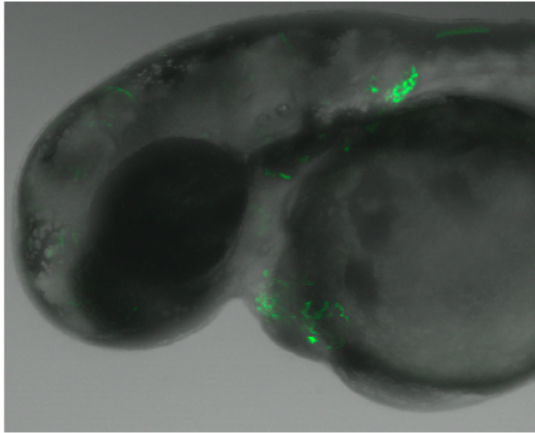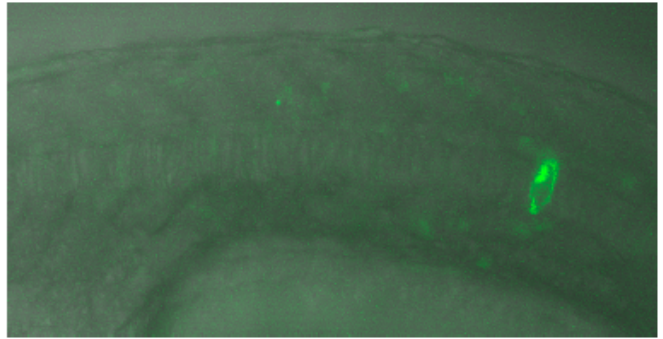

**Figure S4.**
