# Supplementary material for: Human Developmental Enhancers Conserved between Deuterostomes and Protostomes
Source: PubMed Central journal article supplement (PMC3410860; doi:10.1371/journal.pgen.1002852), 2012-08-02
Supplement: pgen.1002852.s006.pdf [file pgen.1002852.s006.pdf]

| Ontology               | Top term                      | Bonferroni corrected Binomial P-value | Fold Enrichment | Number of elements | Number of genes |
|------------------------|-------------------------------|---------------------------------------|-----------------|--------------------|-----------------|
| GO: Molecular function | Sequence-specific DNA binding | <1.0e-324                             | 4.4             | 3,157              | 293             |
| GO: Biological process | Forebrain development         | <1.0e-324                             | 4.1             | 1,159              | 81              |
| GO: Cellular component | Transcription factor complex  | 2.2e-183                              | 3.6             | 734                | 65              |
| MGI: Phenotype         | Neonatal lethality            | <1.0e-324                             | 2.8             | 2,530              | 246             |

**Table S1.**
