# Supplementary material for: Human Developmental Enhancers Conserved between Deuterostomes and Protostomes
Source: PubMed Central journal article supplement (PMC3410860; doi:10.1371/journal.pgen.1002852), 2012-08-02
Supplement: pgen.1002852.s007.pdf [file pgen.1002852.s007.pdf]

| <b>Element (hg18 coords)</b>       | <b>Target gene</b> | <b>Observed depth of conservation</b> | <b>Invertebrate hits where gene synteny can be shown</b>      |
|------------------------------------|--------------------|---------------------------------------|---------------------------------------------------------------|
| chr10:131574504-131574704          | EBF3               | Chordate                              | Amphioxus                                                     |
| chr8:37652008-37652247             | ZNF703             | Deuterostome                          | Amphioxus, Acorn Worm                                         |
| chr4:4909505-4909664               | MSX1               | Deuterostome                          | Amphioxus, Sea urchin                                         |
| BICORE1<br>chr20:29655765-29655862 | ID1                | Bilaterian                            | Amphioxus, Sea urchin,<br>Acorn worm, Owl limpet,<br>Sea hare |
| BICORE2<br>chr10:76832334-76832433 | ZNF503             | Bilaterian                            | Amphioxus, Sea urchin,<br>Acorn worm, Tick                    |

**Table S2.**
