# Supplementary material for: Human Developmental Enhancers Conserved between Deuterostomes and Protostomes
Source: PubMed Central journal article supplement (PMC3410860; doi:10.1371/journal.pgen.1002852), 2012-08-02
Supplement: pgen.1002852.s010.pdf [file pgen.1002852.s010.pdf]

| Gene                                               | Distance to Bicore2 (Kb) | Transcript Identifier  | Top Blastx Hit (NP only)                                   | E-value |
|----------------------------------------------------|--------------------------|------------------------|------------------------------------------------------------|---------|
| Human ZNF503                                       | 0.8                      | Refseq: NM_032772      | NP_663434.2 (Mouse Zfp503)                                 | 0.0     |
| Zebrafish Znf503                                   | 0.7                      | Refseq: NM_198840      | NP_001133583.1 (Salmon Znf503)                             | 0.0     |
| Amphioxus Znf503                                   | 0.3                      | Refseq: XM_002596090   | NP_001161611.1 (Acorn worm NocA-like transcription factor) | 7.0E-24 |
| Sea urchin Znf503                                  | 0.4                      | Refseq: XM_775815      | NP_001161611.1 (Acorn worm NocA-like transcription factor) | 1.0E-64 |
| Acorn worm NocA-like transcription factor (Znf503) | 0.3                      | Refseq: NM_001168139   | NP_942137.1 (Zebrafish Znf503)                             | 5.0E-42 |
| Tick Noc (Znf503)                                  | 0.4                      | Vectorbase: ISCW005133 | NP_476917.1 (Drosophila Noc)                               | 2.0E-38 |

**Table S5.**
