# Supplementary material for: Human Developmental Enhancers Conserved between Deuterostomes and Protostomes
Source: PubMed Central journal article supplement (PMC3410860; doi:10.1371/journal.pgen.1002852), 2012-08-02
Supplement: pgen.1002852.s011.pdf [file pgen.1002852.s011.pdf]

| Element            | Embryos screened | GFP expressing embryos | Specified pattern | %GFP with specified pattern |
|--------------------|------------------|------------------------|-------------------|-----------------------------|
| Human Bicore1      | 64               | 35                     | 26                | 74.3                        |
| Zebrafish Bicore1  | 80               | 67                     | 45                | 67.2                        |
| Sea urchin Bicore1 | 88               | 63                     | 31                | 49.2                        |
| Owl limpet Bicore1 | 112              | 77                     | 68                | 88.3                        |
| Human Bicore2      | 71               | 51                     | 51                | 100.0                       |
| Zebrafish Bicore2  | 71               | 17                     | 13                | 76.5                        |
| Sea urchin Bicore2 | 69               | 41                     | 32                | 78.0                        |
| Tick Bicore2       | 65               | 32                     | 29                | 90.6                        |

**Table S6.**
