# Supplementary material for: Human Developmental Enhancers Conserved between Deuterostomes and Protostomes
Source: PLoS Genet. 2012 Aug 2;8(8):e1002852. doi: 10.1371/journal.pgen.1002852 (PMC3410860; doi:10.1371/journal.pgen.1002852)
Supplement: Table S3 — The 47 non-vertebrate metazoans whose genomes we searched. (PDF) [file pgen.1002852.s008.pdf]

| Species                       | NCBI Taxonomic ID |
|-------------------------------|-------------------|
| acyrthosiphon pisum           | 7029              |
| aedes aegypti                 | 7159              |
| anopheles gambiae             | 7165              |
| apis mellifera                | 7460              |
| aplysia californica           | 6500              |
| branchiostoma floridae        | 7739              |
| caenorhabditis brenneri       | 135651            |
| caenorhabditis briggsae       | 6238              |
| caenorhabditis elegans        | 6239              |
| caenorhabditis japonica       | 281687            |
| caenorhabditis remanei        | 31234             |
| capitella sp. 1               | 73382             |
| ciona intestinalis            | 7719              |
| ciona savignyi                | 51511             |
| culex quinquefasciatus        | 7176              |
| daphnia pulex                 | 6669              |
| drosophila ananassae          | 7217              |
| drosophila erecta             | 7220              |
| drosophila grimshawi          | 7222              |
| drosophila melanogaster       | 7227              |
| drosophila mojavensis         | 7230              |
| drosophila persimilis         | 7234              |
| drosophila pseudoobscura      | 7237              |
| drosophila sechellia          | 7238              |
| drosophila simulans           | 7240              |
| drosophila virilis            | 7244              |
| drosophila yakuba             | 7245              |
| echinococcus multilocularis   | 6211              |
| globodera pallida             | 36090             |
| haemonchus contortus          | 6289              |
| ixodes scapularis             | 6945              |
| lottia gigantea               | 225164            |
| mayetiola destructor          | 39758             |
| nasonia vitripennis           | 7425              |
| nematostella vectensis        | 45351             |
| nippostrongylus brasiliensis  | 27835             |
| oikopleura dioica             | 34765             |
| pediculus humanus corporis    | 121224            |
| pristionchus pacificus        | 54126             |
| rhodnius prolixus             | 13249             |
| saccoglossus kowalevskii      | 10224             |
| schistosoma mansoni           | 6183              |
| schmidtea mediterranea        | 79327             |
| strongylocentrotus purpuratus | 7668              |
| strongyloides ratti           | 34506             |
| tribolium castaneum           | 7070              |
| trichinella spiralis          | 6334              |

**Table S3.**
