# Supplementary material for: Human Developmental Enhancers Conserved between Deuterostomes and Protostomes
Source: PLoS Genet. 2012 Aug 2;8(8):e1002852. doi: 10.1371/journal.pgen.1002852 (PMC3410860; doi:10.1371/journal.pgen.1002852)
Supplement: Table S4 — Distance between instances of Bicore1 and the closest annotated transcript or spliced EST and top Blastx hit when searching the transcript against the Refseq protein database. All instances are upstream (5′) of their respective transcript. (PDF) [file pgen.1002852.s009.pdf]

| Gene           | Distance to Bicore1 (Kb) | Transcript Identifier                 | Top Protein Blastx Hit (NP only)   | E-value |
|----------------|--------------------------|---------------------------------------|------------------------------------|---------|
| Human ID1      | 0.9                      | Refseq: NM_002165                     | NP_001091037.1 (Cow Id1)           | 5.0E-63 |
| Human ID2      | 3.0                      | Refseq: NM_002166                     | NP_034626.1 (Mouse Id2)            | 4.0E-68 |
| Human ID4      | 32.4                     | Refseq: NM_001546                     | NP_112443.1 (Mouse Id4)            | 4.0E-47 |
| Zebrafish Id1  | 1.6                      | Refseq: NM_131245                     | NP_001187857.1 (Catfish Id1)       | 2.0E-53 |
| Zebrafish Id2a | 1.6                      | Refseq: NM_201291                     | NP_001118195.1 (Rainbow trout id2) | 2.0E-60 |
| Zebrafish Id3  | 5.7                      | Refseq: NM_152967                     | NP_989920.1 (Chicken Id3)          | 1.0E-34 |
| Amphioxus Id   | 0.6                      | Refseq: XM_002609573                  | NP_988885.1 (Xenopus Id2)          | 2.0E-15 |
| Sea urchin Id  | 3.1                      | Refseq: XM_775662                     | NP_001161570.1 (Acorn worm Id)     | 3.0E-12 |
| Acorn worm Id  | 0.5                      | Refseq: NM_001168098                  | NP_112443.1 (Mouse Id4)            | 1.0E-17 |
| Owl impet Id   | 0.3                      | JGI Gene Catalog Transcrip Id: 233168 | NP_001165446.1 (Xenopus Id4)       | 4.0E-09 |
| Sea hare Id    | 0.9                      | Spliced Est: FF075156                 | NP_001134882.1 (Salmon Id2)        | 1.0E-03 |

**Table S4.**
