# Supplementary material for: Human Developmental Enhancers Conserved between Deuterostomes and Protostomes
Source: PLoS Genet. 2012 Aug 2;8(8):e1002852. doi: 10.1371/journal.pgen.1002852 (PMC3410860; doi:10.1371/journal.pgen.1002852)
Supplement: Table S7 — Primers used to amplify out Bicore sequences for zebrafish transgenic enhancer assays. (PDF) [file pgen.1002852.s012.pdf]

| <b>Locus</b>       | <b>Primer1</b>             | <b>Primer2</b>           |
|--------------------|----------------------------|--------------------------|
| Human Bicore1      | CAGTTTGTCTGTCTCCATGGCGACC  | TCTGAACCAGCGGCTCAGACCGT  |
| Zebrafish Bicore1  | TTGTTTGTGTTGCTATAGGGACCGCC | CAAACCGAAGCAGACTGCCGGG   |
| Sea urchin Bicore1 | GTTACTATGGCGACCGCCAG       | CTCACGGCGACAGACCGGCG     |
| Human Bicore2      | CTCCACCCCTGTTTTCTC         | AGGCCGCTCCTCTTTTCC       |
| Zebrafish Bicore2  | ACAAGAGCAGACCAATGCAG       | AAGTGACTCTTCTTCTGGATGCTT |
| Sea urchin Bicore2 | CGATTTATCTCGGGGAATCA       | CGGGGATGATTGATATGTGA     |

**Table S7.**
